# Supplementary material for: Production of Trans-Cinnamic Acid by Immobilization of the Bambusa oldhamii BoPAL1 and BoPAL2 Phenylalanine Ammonia-Lyases on Electrospun Nanofibers
Source: MDPI journal article supplement (doi:10.3390/ijms222011184), 2021-10-17
Supplement: s1 [file s1]

**Table S1.** Plasmids used for bamboo BoPAL1 and BoPAL2 expressions in *Escherichia coli* and *Pichia pastoris*

| Plasmids        | Relevant characteristics                                                          | Source/Ref. |
|-----------------|-----------------------------------------------------------------------------------|-------------|
| pTrcHisA        | <i>E. coli</i> expression vector with N-terminal His <sub>6</sub> -tag fusion     | Invitrogen  |
| pTrcHisA-BoPAL1 | <i>BoPAL1</i> coding sequence inserted into pTrcHisA for eBoPAL1 expression       | 31          |
| pTrcHisA-BoPAL2 | <i>BoPAL2</i> coding sequence inserted into pTrcHisA for eBoPAL2 expression       | 29          |
| pPICZA          | <i>P. pastoris</i> expression vector with C-terminal His <sub>6</sub> -tag fusion | Invitrogen  |
| pPICZA-BoPAL1   | <i>BoPAL1</i> coding sequence inserted into pPICZA for pBoPAL1 expression         | 31          |
| pPICZA-BoPAL2   | <i>BoPAL2</i> coding sequence inserted into pPICZA for pBoPAL2 expression         | 29          |

**Table S2.** Ranges of experimental parameters of five-level-three-factor central composite design

| Factors                           | Levels |      |       |      |      |
|-----------------------------------|--------|------|-------|------|------|
|                                   | -1.68  | -1   | 0     | 1    | 1.68 |
| X <sub>1</sub> : Flow rate (ml/h) | 0.08   | 0.09 | 0.105 | 0.12 | 0.13 |
| X <sub>2</sub> : Voltage (kV)     | 11     | 12   | 13.5  | 15   | 16   |
| X <sub>3</sub> : Distance (cm)    | 8.6    | 10   | 12    | 14   | 15.3 |

**Table S3.** Central composite design and experimental data of immobilized PAL activity and nanofiber diameter

| Run | X <sub>1</sub> : Flow rate<br>(ml/min) | X <sub>2</sub> : Voltage<br>(kV) | X <sub>3</sub> : Distance<br>(cm) | Y <sub>1</sub> : PAL activity<br>(μU/mg NF) <sup>1</sup> | Y <sub>2</sub> : Diameter<br>(nm) |
|-----|----------------------------------------|----------------------------------|-----------------------------------|----------------------------------------------------------|-----------------------------------|
| 1   | 0                                      | 0                                | 0                                 | 250                                                      | 127                               |
| 2   | 0                                      | 0                                | 0                                 | 240                                                      | 122                               |
| 3   | 0                                      | 0                                | 0                                 | 235                                                      | 122                               |
| 4   | 0                                      | 0                                | 0                                 | 239                                                      | 113                               |
| 5   | 1                                      | 1                                | -1                                | 181                                                      | 155                               |
| 6   | 0                                      | 0                                | -1.68                             | 192                                                      | 138                               |
| 7   | -1                                     | 1                                | -1                                | 203                                                      | 136                               |
| 8   | 1.68                                   | 0                                | 0                                 | 184                                                      | 171                               |
| 9   | -1.68                                  | 0                                | 0                                 | 215                                                      | 131                               |
| 10  | 0                                      | -1.68                            | 0                                 | 191                                                      | 137                               |
| 11  | -1                                     | 1                                | 1                                 | 234                                                      | 124                               |
| 12  | 0                                      | 0                                | 0                                 | 241                                                      | 125                               |
| 13  | -1                                     | -1                               | 1                                 | 235                                                      | 123                               |
| 14  | 1                                      | -1                               | -1                                | 199                                                      | 175                               |
| 15  | 1                                      | -1                               | 1                                 | 192                                                      | 129                               |
| 16  | 0                                      | 0                                | 0                                 | 238                                                      | 112                               |
| 17  | 0                                      | 1.68                             | 0                                 | 225                                                      | 149                               |
| 18  | 1                                      | 1                                | 1                                 | 192                                                      | 114                               |
| 19  | 0                                      | 0                                | 1.68                              | 226                                                      | 115                               |
| 20  | -1                                     | -1                               | -1                                | 170                                                      | 152                               |

<sup>1</sup> PAL activity unit (U) is defined as 1 mole *trans*-cinnamic acid formation per minute. NF, nanofiber.
